# Supplementary material for: Preferences for Surveillance of Barrett’s Oesophagus: a Discrete Choice Experiment
Source: Springer Nature journal article supplement (doi:10.1007/s11605-018-4049-6), 2018-11-26
Supplement: MOESM1 [file 16295360]

Online Appendix

Attribute description for surveillance method

(This information was provided to participants before completing the questionnaire)

Endoscopic surveillance in patients with Barrett’s esophagus is the current standard of practice in Australia and internationally. Blood tests and breath tests are currently not available in clinical practice, but we are working with scientists in the laboratory to develop these options, and we need to know how good these tests need to be before they can be considered for replacement of endoscopy. If they become available in the future, the information you provide will help us to determine how to redesign follow-up of Barrett’s esophagus.

- **Endoscopy**

The surveillance endoscopy takes place in an endoscopy unit in hospital after 6 hours of fasting. An intravenous line is inserted in an arm to deliver sedative medication to a level where the patient is very relaxed and generally not aware of the examination. During the endoscopy the inner lining of the esophagus is examined visually and multiple small tissue biopsy samples collected. Obtaining these tissue samples is not painful and the potential for complications such as bleeding is usually minimal. After endoscopy, the patient is observed for a short period of time while the sedative medication wears off. However, because of the medication used, patients cannot drive home or return to work, and need to take the rest of the day off. Upper gastrointestinal endoscopy is considered to be a very safe procedure and serious complications (inhaling fluids into the lungs, bleeding and perforation of the esophagus) are extremely rare.

- **Blood test**

A blood test can be taken by a local General Practitioner or at a blood collection centre. It does not require admission to hospital. No preparation is necessary, and no recovery time is generally required. Sometimes a bruise develops where a needle has been inserted and there is a very small risk of infection at the puncture site. The only time off work is the time taken to get the blood test taken.

- **Breath test**

A breath test is performed with a prepared kit, which can be sent to the patient’s home. For 4 hours before the test, patients should not eat, drink or smoke. For the test the patient first drinks a lemon-tasting solution, and then waits 30 minutes before providing three consecutive breath samples by breathing into collection tubes. The tubes can then be placed in a box and returned to the laboratory by mailing on the same day. No time off work is required, and travel to a collection centre or hospital is not required.
